# Supplementary material for: Vapor-based micro/nano-partitioning of fluoro-functional group immobilization for long-term stable cell patterning
Source: Royal Society of Chemistry journal article supplement (doi:10.1039/c6ra16906f), 2016-01-01
Supplement: c6ra16906f1.pdf [file c6ra16906f1.pdf]

## Supplementary Figure 1

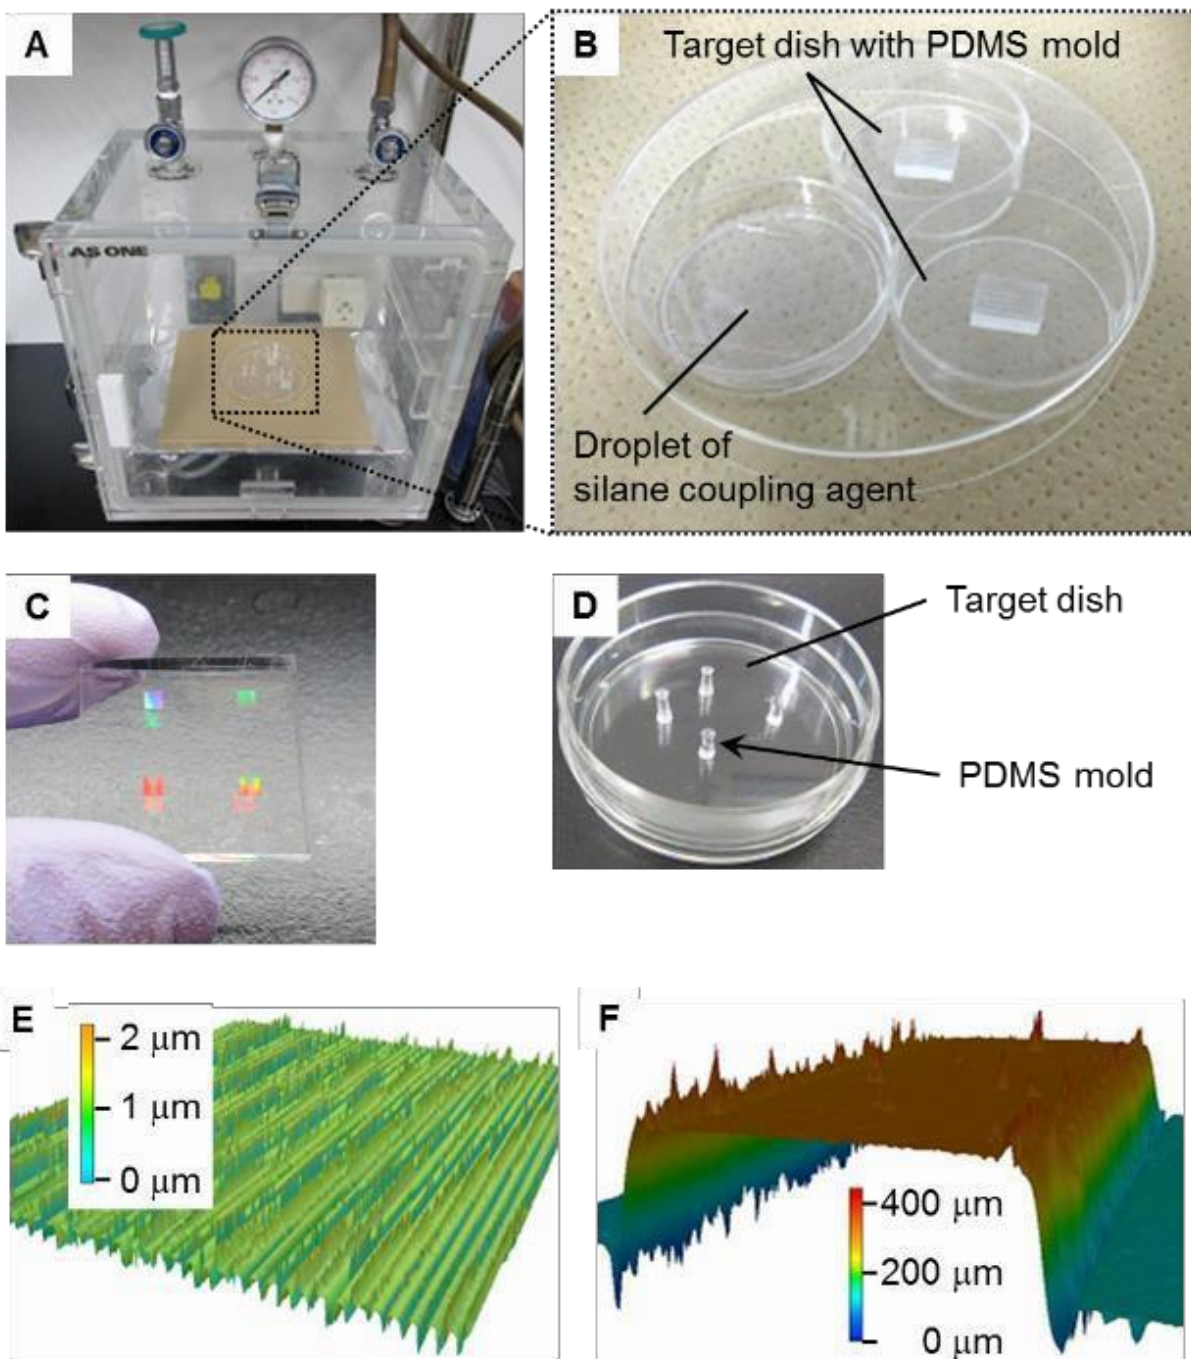

**Supplementary Figure 1.** (A) Photo of silane coupling agent immobilization in a vacuum desiccator. (B) Close-up view of target dishes and the dish containing silane coupling agent. (C) Photo of a plate of having four PDMS molds with nano grooves. (D) Photo of four PDMS molds which were placed on a target dish. (E) A three-dimensional image of a PDMS mold with nano grooves. (F) A three-dimensional image of a PDMS mold with micro grooves.

Supplementary Figure 2

**A: Glass bottom dish**

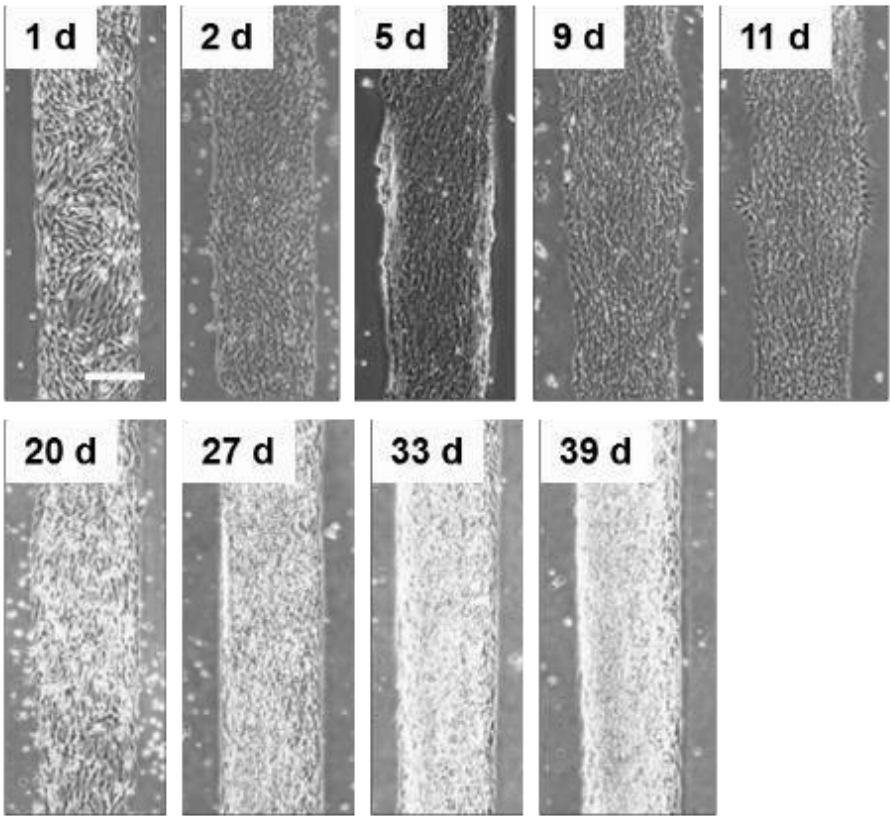

**B: Polystyrene dish**

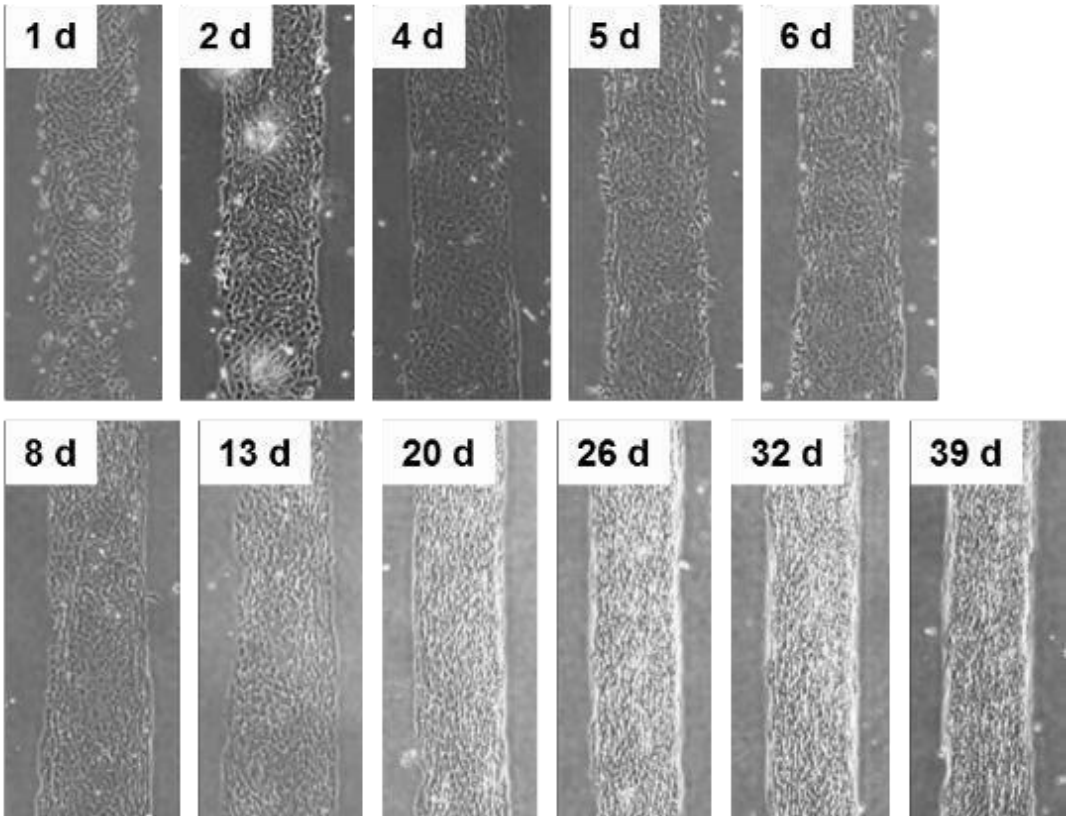

**Supplementary Figure 2.** Microphotographs of cell patterns during 39-d-cultivation of C2C12 cells on (A) a glass bottom dish and (B) a polystyrene dish. The white bar indicates 200  $\mu\text{m}$  length and the scales of all microphotographs are the same.
